# Supplementary material
Source: Springer Nature journal article supplement (https://www.springermedizin.de/resource/supplementary/12890_2013_452_MOESM3_ESM.pdf/9505250)

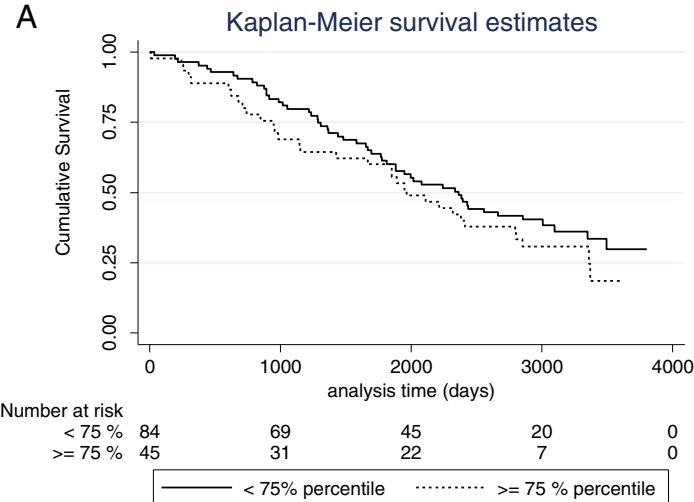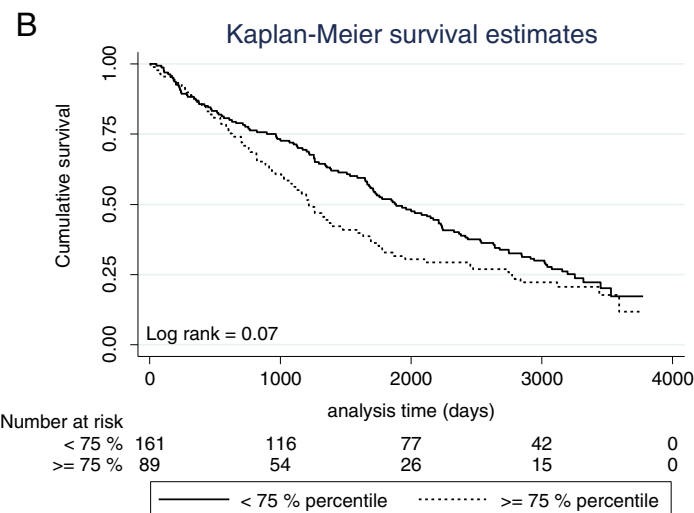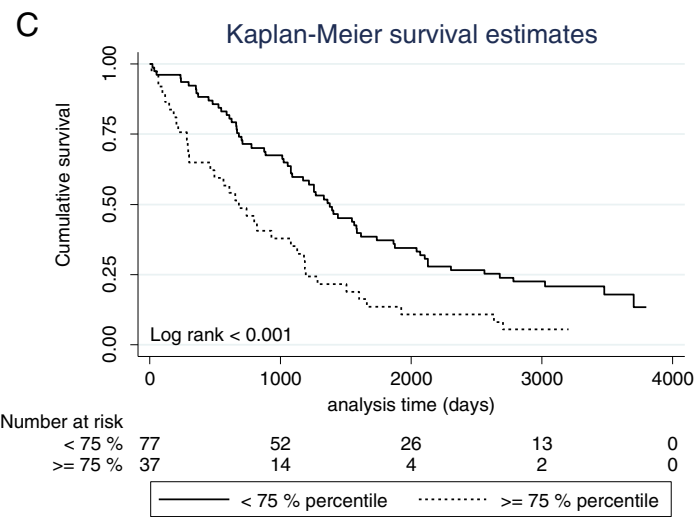

Supplement: MOESM3 [file 9505250]
